# Supplementary material for: 25% Dextrose Versus 24% Sucrose for Heel Lancing in Preterm Infants: A Noninferiority RCT
Source: Oxford University Press journal article supplement (doi:10.1542/peds.2021-054618), 2022-04-22
Supplement: peds_2021054618supplementarydata.pdf [file peds_2021054618supplementarydata.pdf]

## Supplemental Information

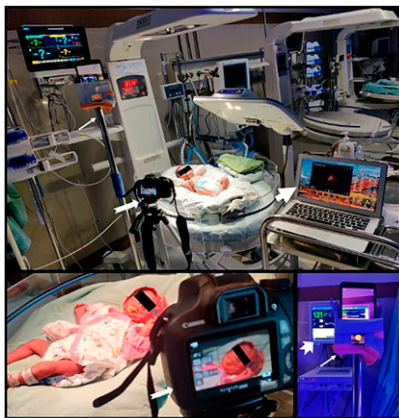

### SUPPLEMENTAL FIGURE 5

Arrangements made for the heel-lance procedure, showing a digital camera (EOS 1300, Canon; notched arrow) that recorded the infants' facial expressions, a modified intravenous stand-mounted mobile phone camera (Xiaomi Mi Max 2) (arrow) that recorded the vitals from the monitor (notched arrowhead), and a laptop computer (arrowhead).

| Video sr no. _____                            |                                      | USER CODE: _____                              |                | Baseline state           |             |               | Raw data      |                 |               |                 |                | PIPP-Score       |                 |                 | PIPP-R score     |           |           |            |
|-----------------------------------------------|--------------------------------------|-----------------------------------------------|----------------|--------------------------|-------------|---------------|---------------|-----------------|---------------|-----------------|----------------|------------------|-----------------|-----------------|------------------|-----------|-----------|------------|
| Process                                       | Indicators                           | Score                                         | score          | Corrected GA             | Baseline HR | Baseline SpO2 | PIPP 30 (raw) | PIPP 30 (final) | PIPP 60 (raw) | PIPP 60 (final) | PIPP 120 (raw) | PIPP 120 (final) | PIPP 30 (score) | PIPP 60 (score) | PIPP 120 (score) | PIPP-R 30 | PIPP-R 60 | PIPP-R 120 |
| Chart                                         | Corrected Gestational age (weeks)    | >=36                                          | 0              |                          |             |               |               |                 |               |                 |                |                  |                 |                 |                  |           |           |            |
|                                               |                                      | 32- 35 <sup>6/7</sup>                         | 1              |                          |             |               |               |                 |               |                 |                |                  |                 |                 |                  |           |           |            |
|                                               |                                      | 28-31 <sup>6/7</sup>                          | 2              |                          |             |               |               |                 |               |                 |                |                  |                 |                 |                  |           |           |            |
|                                               |                                      | < 28                                          | 3              |                          |             |               |               |                 |               |                 |                |                  |                 |                 |                  |           |           |            |
| Observe infant for 15 sec                     | Behavioral state                     | Active awake, eyes open, facial movements +   | 0              | Baseline behaviour score |             |               |               |                 |               |                 |                |                  |                 |                 |                  |           |           |            |
|                                               |                                      | Quite awake, eyes open, no facial movements   | 1              | Min                      | Max         | Predominant   |               |                 |               |                 |                |                  |                 |                 |                  |           |           |            |
|                                               |                                      | Active sleep, eyes closed, facial movements + | 2              |                          |             |               |               |                 |               |                 |                |                  |                 |                 |                  |           |           |            |
|                                               |                                      | Quite sleep, eyes closed, no facial movements | 3              |                          |             |               |               |                 |               |                 |                |                  |                 |                 |                  |           |           |            |
|                                               |                                      |                                               |                |                          |             |               |               |                 |               |                 |                |                  |                 |                 |                  |           |           |            |
| Observe baseline HR and O2 sats for 30 sec    | Max HR increase                      | 0-4/min                                       | 0              |                          |             |               |               |                 |               |                 |                |                  |                 |                 |                  |           |           |            |
|                                               |                                      | 5-14/min                                      | 1              |                          |             |               |               |                 |               |                 |                |                  |                 |                 |                  |           |           |            |
|                                               |                                      | 15-24/min                                     | 2              |                          |             |               |               |                 |               |                 |                |                  |                 |                 |                  |           |           |            |
|                                               |                                      | >= 25/min                                     | 3              |                          |             |               |               |                 |               |                 |                |                  |                 |                 |                  |           |           |            |
|                                               | Min SPO <sub>2</sub> fall %          | 0-2.4 %                                       | 0              |                          |             |               |               |                 |               |                 |                |                  |                 |                 |                  |           |           |            |
|                                               |                                      | 2.5-4.9%                                      | 1              |                          |             |               |               |                 |               |                 |                |                  |                 |                 |                  |           |           |            |
|                                               |                                      | 5-7.4%                                        | 2              |                          |             |               |               |                 |               |                 |                |                  |                 |                 |                  |           |           |            |
|                                               |                                      | >= 7.5%                                       | 3              |                          |             |               |               |                 |               |                 |                |                  |                 |                 |                  |           |           |            |
| Observe infant's facial action for 30 seconds | Brow bulge (% of time spent)         | None (0-9%)                                   | 0              |                          |             |               |               |                 |               |                 |                |                  |                 |                 |                  |           |           |            |
|                                               |                                      | Minimum (10-39%)                              | 1              |                          |             |               |               |                 |               |                 |                |                  |                 |                 |                  |           |           |            |
|                                               |                                      | Moderate (40-69%)                             | 2              |                          |             |               |               |                 |               |                 |                |                  |                 |                 |                  |           |           |            |
|                                               |                                      | Maximum (>= 70%)                              | 3              |                          |             |               |               |                 |               |                 |                |                  |                 |                 |                  |           |           |            |
|                                               | Eye squeeze (% of time spent)        | None (0-9%)                                   | 0              |                          |             |               |               |                 |               |                 |                |                  |                 |                 |                  |           |           |            |
|                                               |                                      | Minimum (10-39%)                              | 1              |                          |             |               |               |                 |               |                 |                |                  |                 |                 |                  |           |           |            |
|                                               |                                      | Moderate (40-69%)                             | 2              |                          |             |               |               |                 |               |                 |                |                  |                 |                 |                  |           |           |            |
|                                               |                                      | Maximum (>= 70%)                              | 3              |                          |             |               |               |                 |               |                 |                |                  |                 |                 |                  |           |           |            |
|                                               | Naso-labial furrow (% of time spent) | None (0-9%)                                   | 0              |                          |             |               |               |                 |               |                 |                |                  |                 |                 |                  |           |           |            |
|                                               |                                      | Minimum (10-39%)                              | 1              |                          |             |               |               |                 |               |                 |                |                  |                 |                 |                  |           |           |            |
|                                               |                                      | Moderate (40-69%)                             | 2              |                          |             |               |               |                 |               |                 |                |                  |                 |                 |                  |           |           |            |
|                                               |                                      | Maximum (>= 70%)                              | 3              |                          |             |               |               |                 |               |                 |                |                  |                 |                 |                  |           |           |            |
| FINAL SCORE                                   |                                      |                                               | Subtotal score |                          |             |               |               |                 |               |                 |                |                  |                 |                 |                  |           |           |            |

**SUPPLEMENTAL FIGURE 6**  
The sheet used for scoring PIPP and PIPP-R.

**SUPPLEMENTAL TABLE 3** Description of the Various Video Segments

| Video Segment | Phase | Duration (s) | Time Period              | Purpose                                           |
|---------------|-------|--------------|--------------------------|---------------------------------------------------|
| 1             | a     | 15           | 1 min 30 s to 1 min 45 s | Baseline physiologic parameters, behavioral state |
| 2             | e     | 30           | 4 min 30 s to 5 min 0 s  | PIPP at 30 s                                      |
| 3             | e     | 30           | 5 min 0 s to 5 min 30 s  | PIPP at 60 s                                      |
| 4             | e     | 30           | 6 min 0 s to 6 min 30 s  | PIPP at 120 s                                     |

**SUPPLEMENTAL TABLE 4** Instructions for Scoring PIPP and PIPP-R

| Instructions for Scoring |                                                                                                                                                                                                                                                                                                                                                                                                                                                                                                                                                                                                                                                                                                                                                       |
|--------------------------|-------------------------------------------------------------------------------------------------------------------------------------------------------------------------------------------------------------------------------------------------------------------------------------------------------------------------------------------------------------------------------------------------------------------------------------------------------------------------------------------------------------------------------------------------------------------------------------------------------------------------------------------------------------------------------------------------------------------------------------------------------|
| PIPP                     | <p>Step 1: Familiarize yourself with each indicator and how it is to be scored.</p> <p>Step 2: Nurse stands where the baby's body and face can be seen clearly.</p> <p>Step 3: Score gestational age before you begin the assessment.</p> <p>Step 4: Score behavioral state by observing the infant for 15 s.</p> <p>Step 5: Record baseline heart rate and oxygen saturation.</p> <p>Step 6: Observe the infant for 30 s. You will need to look back and forth from the heart monitor to the baby's face.</p> <p>Step 7: Score physiologic and facial changes seen during that time and record immediately following the observation period.</p> <p>Step 8: Calculate the total score.</p>                                                           |
| PIPP-R                   | <p>Step 1: Observe the infant for 15 s at rest and assess the vital sign indicators (highest HR and lowest SpO<sub>2</sub> and behavioral state).</p> <p>Step 2: Observe infant for 30 s after procedure and assess the change in vital sign indicators (maximum HR, lowest SpO<sub>2</sub>, and duration of facial actions observed). If an infant requires an increase in oxygen at any time before or during the procedure, score as 3 for SpO<sub>2</sub> indicator.</p> <p>Step 3: Calculate the subtotal score from step 2.</p> <p>Step 4: Score for corrected gestational age and behavioral state if the subtotal score &gt;0.</p> <p>Step 5: Calculate the total score by adding subtotal, gestational age, and behavioral state scores.</p> |

HR, heart rate; SpO<sub>2</sub>, pulse oxygen saturation.

**SUPPLEMENTARY TABLE 5** Exploratory Subgroup Analysis

| Pain Score                                                           | 25% Dextrose     | 24% Sucrose      | P     |
|----------------------------------------------------------------------|------------------|------------------|-------|
| 28 wk and 0 d to 31 wk and 6 d ( <i>n</i> = 7 and 9, respectively)   |                  |                  |       |
| PIPP at 30 s                                                         | 6.50 (4.75–9.25) | 7.00 (5.25–9.25) | .792  |
| PIPP at 60 s                                                         | 5.50 (4.75–7.00) | 5.50 (4.50–6.50) | .958  |
| PIPP at 120 s                                                        | 6.00 (4.75–8.00) | 5.00 (4.00–6.50) | .428  |
| PIPP-R at 30 s                                                       | 6.50 (4.75–9.25) | 7.00 (5.25–9.25) | .792  |
| PIPP-R at 60 s                                                       | 5.50 (4.75–7.00) | 5.50 (4.50–6.50) | .958  |
| PIPP-R at 120 s                                                      | 6.00 (4.75–8.00) | 5.00 (0.00–6.50) | .313  |
| 32 wk and 0 d to 35 wk and 6 d ( <i>n</i> = 25 and 22, respectively) |                  |                  |       |
| PIPP at 30 s                                                         | 5.50 (4.00–7.50) | 7.00 (7.50–8.50) | .181  |
| PIPP at 60 s                                                         | 4.50 (3.75–6.00) | 5.00 (4.50–7.00) | .096  |
| PIPP at 120 s                                                        | 4.00 (3.00–6.00) | 5.00 (4.00–5.00) | .138  |
| PIPP-R at 30 s                                                       | 5.50 (4.00–7.50) | 7.00 (5.50–8.50) | .185  |
| PIPP-R at 60 s                                                       | 4.50 (0.00–6.00) | 5.00 (4.50–7.00) | .112  |
| PIPP-R at 120 s                                                      | 3.50 (0.00–6.00) | 5.00 (4.00–5.00) | 0.173 |
| Infants not on nCPAP ( <i>n</i> = 25 and 26, respectively)           |                  |                  |       |
| PIPP at 30 s                                                         | 6.48 (2.4)       | 7.12 (2.03)      | .311  |
| PIPP at 60 s                                                         | 5.08 (2.27)      | 5.46 (1.56)      | .486  |
| PIPP at 120 s                                                        | 4.68 (1.95)      | 5.08 (1.35)      | 0.405 |

Data are presented as median (IQR) or mean (SD). nCPAP, nasal continuous positive airway pressure.
